# Supplementary material for: Comparison of circular RNA prediction tools
Source: PubMed Central journal article supplement — Nucleic Acids Res. 2015 Dec 10;44(6):e58. doi: 10.1093/nar/gkv1458 (PMC4824091; doi:10.1093/nar/gkv1458), 2015-12-10
Supplement: supp_gkv1458_nar-02400-met-n-2015-File004.pdf [file supp_gkv1458_nar-02400-met-n-2015-File004.pdf]

## Supplementary Figure 1

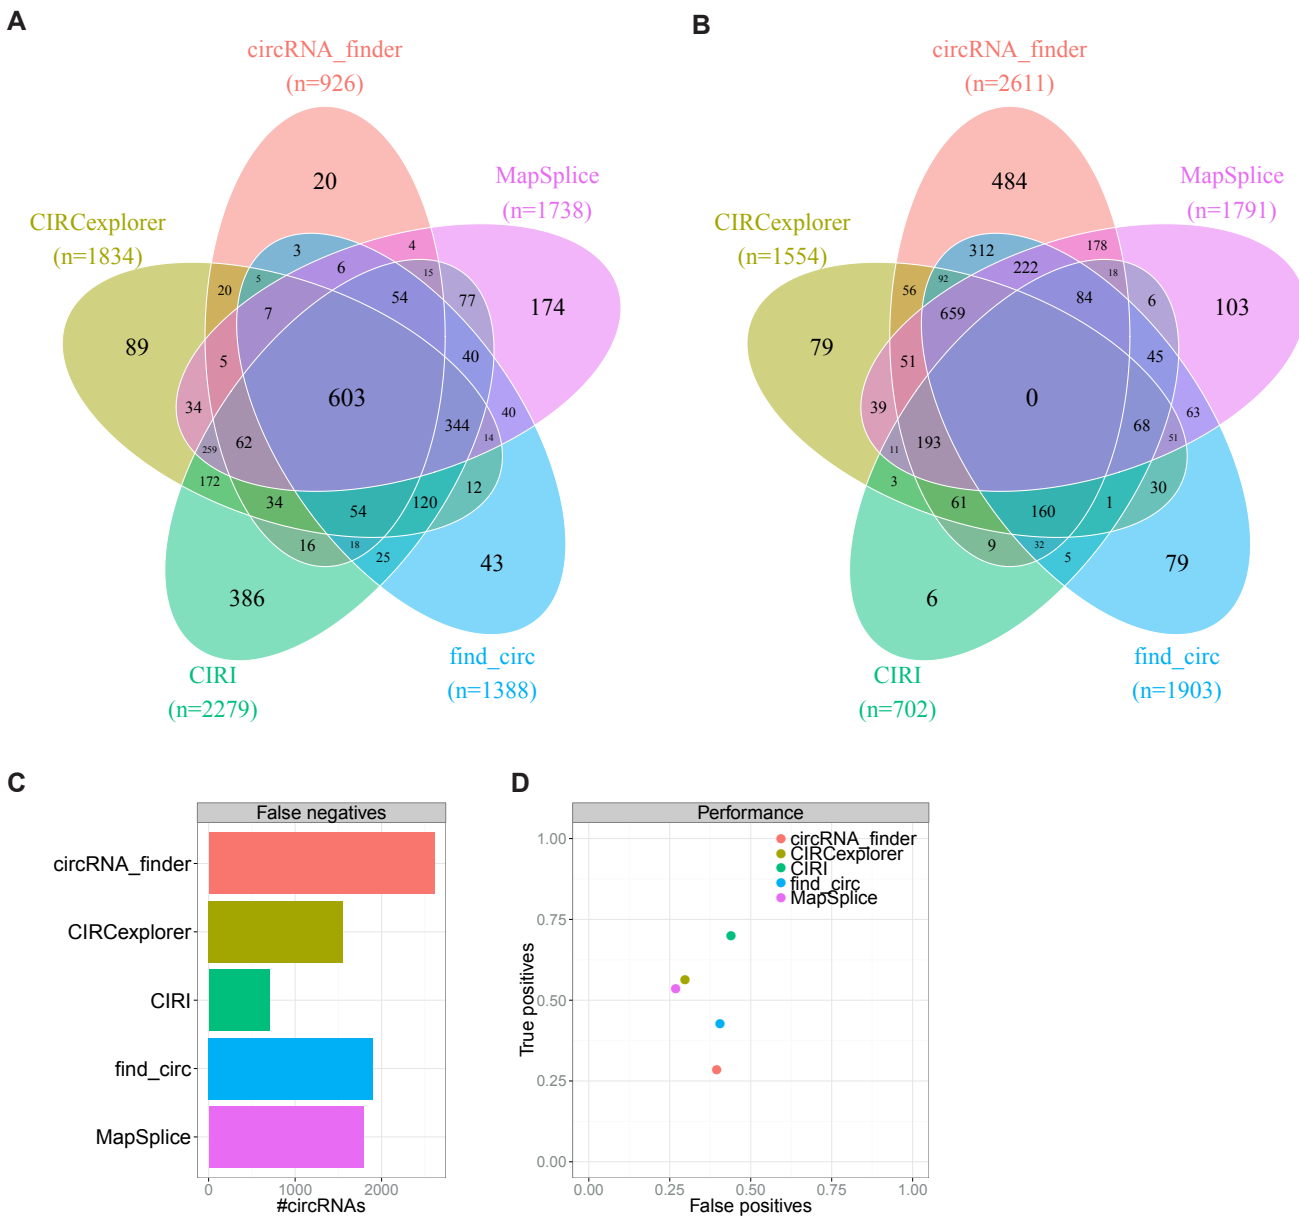

**Supplementary Figure 1: True positives and false negatives. A+B)** Venn diagram depicting the overlap of RNase R resistant circRNAs between the 5 different prediction algorithms (A), or the overlap of false negatives (i.e. circRNAs missed by the individual algorithms) based on the collective group of all RNase R resistant circRNA predicted at least once using all algorithms (B). **C)** Barplot showing number of false positives calculated as the total number of RNase R resistant circRNA ( $n=3251$ ) subtracted by true positive circRNAs predicted by the individual algorithms. **D)** The overall performance of the algorithms depicted as the true positive by false positive rate. The true positive rate is calculated as the fraction of RNase R resistant circRNAs relative to the total number of circRNAs for each algorithm. The false positive rate is calculated as  $1 - \text{sensitivity}$ , where sensitivity is defined as the fraction of true positives predicted by individual algorithms relative to the total number of RNase R resistant circRNAs found collectively by all algorithms.
